# Supplementary material for: The motivation to inform others: a field experiment with wild chimpanzees
Source: PeerJ. 2024 Dec 6;12:e18498. doi: 10.7717/peerj.18498 (PMC11627086; doi:10.7717/peerj.18498)
Supplement: Supplemental Information 1 [file peerj-12-18498-s001.xlsx]

## Sheet: data
ID	TRIAL	GROUP	DELAY	N.CALLS	D.LOOK.30.R	CODINGTIMEMAX30	DETECTIONTIME	SPIDER.MOVE	DETECTIONTIME-H	DETECTIONTIME-O	SPIDER.MOVE-H	SPIDER.MOVE-O	D.LOOK.30-O	D.LOOK.30-H
FK	1	S	1	4	30	30	86.243	16.244	86.553	86.72	16.297	16.565	29.2	30
FK	2	S	1	0	21241	30	44.078	25.474	44.009	43.6	25.444	25.714	22.12	20.198
KT	1	S	5	0	11645	30	58.047	28.856	58.108	57.72	28.445	28.859	13.52	8.368
KT	2	S	5	1	18002	30	203.767	24.78	204.183	203.24	24.201	24.852	20.198	17.193
KZ	1	N	2	0	26346	30	114.06	26.803	116.435	115.28	26.704	26.464	26.12	15.357
KZ	2	N	2	0	10841	30	75.911	23.89	76.107	76.269	25.517	24.869	12.565	10.993
MS	1	S	0.18	0	23083	30	173.566	21.43	173.812	174.778	21.314	21.431	22.783	22.932
MS	2	S	0.18	0	23101	30	116.626	28.355	117.128	117.951	27.76	28.057	26.286	19.22
PS	1	N	7	3	7726	16.517	54.537	6.823	49.635	63.527	7.482	7.219	7.037	11.234
PS	2	N	7	0	10077	25.161	31.642	11.293	26.591	26.926	10.083	10.441	19.584	12.542
SQ	1	N	34	1	26.84	30	503.527	25.264	504.595	504.556	24.494	25.65	25.883	18.168
SQ	2	N	34	0	6263	30	33.139	14.691	34.445	32.56	14.456	14.754	7.543	5.462
ZF	1	S	42	5	17377	30	60.548	7.162	61.132	61.382	7.074	7.484	16.844	16.749
ZF	2	S	42	3	16848	30	239.727	15.978	215.375	227.12
ZG	1	N	2	1	24744	30	26.991	15.823	27.234	27.426	15.677	15.764	24.656	23.77
ZG	2	N	2	2	11804	30	240.548	27.272	240.776	245.541	27.494	24.819	12.902	7.183
ZL	1	S	2	0	29106	30	121.715	6.49	124.003	128.805	5.617	6.683	30	16.365
ZL	2	S	2	1	14714	30	21.48	5.484	22.307	22.208	5.229	5.971	13.637	13.637

## Sheet: datawide
ID	GROUP	DELAY	SPIDER.MOVE_1	N.CALLS_1	D.LOOK.30.R_1	CODINGTIMEMAX30_1	N.CALLS_2	D.LOOK.30.R_2	CODINGTIMEMAX30_2	SPIDER.MOVE_2
FK	S	1	16.244	4	30	30	0	21.241	30	25.474
KT	S	5	28.856	0	11.645	30	1	18.002	30	24.78
KZ	N	2	26.803	0	26.346	30	0	10.841	30	23.89
MS	S	0.18	21.43	0	23.083	30	0	23.101	30	28.355
PS	N	7	6.823	3	7.726	16.517	0	10.077	25.161	11.293
SQ	N	34	25.264	1	26.84	30	0	6.263	30	14.691
ZF	S	42	7.162	5	17.377	30	3	16.848	30	15.978
ZG	N	2	15.823	1	24.744	30	2	11.804	30	27.272
ZL	S	2	6.49	0	29.106	30	1	14.714	30	5.484

## Sheet: nb
Coding
CODINGTIMEMAX30	Total time in which the animal can see the spider from detection onwards (max. 30)
SPIDER.MOVE	Total time during which the spider was activated during the experiment from onset up to 30s after detection
N.CALLS	Total number of calls observed
D.LOOK.30.R	Looking time to spider from detection and up to 30s
DETECTIONTIME	Time used for onset of first look
Gui
Harriett
Olivia
